# Supplementary material for: Large-scale identification of small noncoding RNA with strand-specific deep sequencing and characterization of a novel virulence-related sRNA in Brucella melitensis
Source: PubMed Central journal article supplement (PMC4845025; doi:10.1038/srep25123), 2016-04-26
Supplement: srep25123-s1.pdf [file srep25123-s1.pdf]

**Large-scale identification of small noncoding RNA with strand-specific deep sequencing and characterization of a novel virulence-related sRNA in *Brucella melitensis***

Zhijun Zhong<sup>1,2#</sup>, Xiaoyang Xu<sup>1,2#</sup>, Xinran Li<sup>2,#</sup>, Shiwei Liu<sup>3,#</sup>, Shuangshuang Lei<sup>1,2</sup>,  
Mingjuan Yang<sup>2</sup>, Jiuxuan Yu<sup>2</sup>, Jiuyun Yuan<sup>2</sup>, Yuehua Ke<sup>2</sup>, Xinying Du<sup>2</sup>, Zhoujia Wang<sup>2</sup>,  
Zihua Ren<sup>1</sup>, Guangneng Peng<sup>1,\*</sup>, Yufei Wang<sup>2,4,\*</sup>, Zeliang Chen<sup>2,5,\*</sup>

1 College of Veterinary Medicine, Key Laboratory of Animal Disease and Human Health of Sichuan Province, Sichuan Agricultural University, Sichuan Province, Chengdu 611130, P. R. China

2 Institute of Disease Control and Prevention, Academy of Military Medical Sciences, Beijing 100071, P. R. China

3 Wangjing Hospital, Academy of Traditional Chinese Medicine, Beijing 100102, P. R. China

4 Department of Laboratory Medicine, The General Hospital of Chinese People's Armed Police Forces, Beijing 100039, P. R. China

5 Key Laboratory of Zoonotic of Liaoning Province, College of Animal Science and Veterinary Medicine, Shenyang Agricultural University, Liaoning Province, Shenyang 110866, P. R. China

# These authors contributed equally to this work

\* Corresponding authors:

Guangneng Peng: No. 211, Huimin Road, Wenjiang District, Chengdu 611130, P.R.

China. Tel: 86-028-862-91176; Fax: +86-028-862-91176; E-mail: pgn.sicau@163.com

Yufei Wang: No. 69, Yongding Road, Haidian District, Beijing 100039, P.R. China.

Tel: 86-10-57976754; Fax: 86-10-57976754; E-mail: tosy@163.com

Zeliang Chen: No. 20, Dongdajie, Fengtai District, Beijing 100071, P.R. China.

Tel: 86-10-66948387; Fax: 86-10-66948387; E-mail: zeliangchen@yahoo.com

Supplementary material

Figures

A

| Mapping Statistics   | Map to Genome |            | Map to Gene  |            |
|----------------------|---------------|------------|--------------|------------|
|                      | Reads number  | Percentage | Reads number | Percentage |
| Total Reads          | 13249202      | 100.00%    | 13249202     | 100.00%    |
| Total BasePairs      | 1192428180    | 100.00%    | 1192428180   | 100.00%    |
| Total Mapped Reads   | 12889855      | 97.29%     | 8717156      | 65.79%     |
| Perfect match        | 10471858      | 79.04%     | 7083540      | 53.46%     |
| <=5bp mismatch       | 2417997       | 18.25%     | 1633616      | 12.33%     |
| Unique match         | 12485618      | 94.24%     | 8442202      | 63.72%     |
| Multi-position match | 404237        | 3.05%      | 274954       | 2.08%      |
| Total Unmapped Reads | 359347        | 2.71%      | 4532046      | 34.21%     |

B

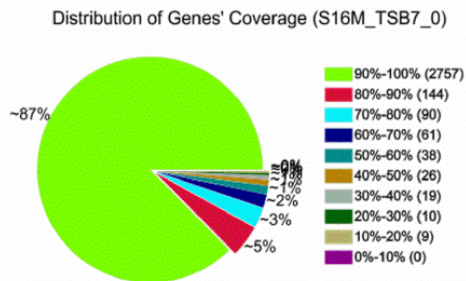

C

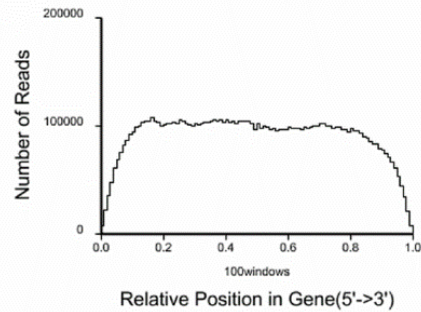

Figure S1. Statistical analysis of strand-specific RNA-seq.

(A) Mapping statistics of RNA sequencing reads; (B) distribution of gene coverage; (C) relative positions of mapped reads in genes (5'-3').

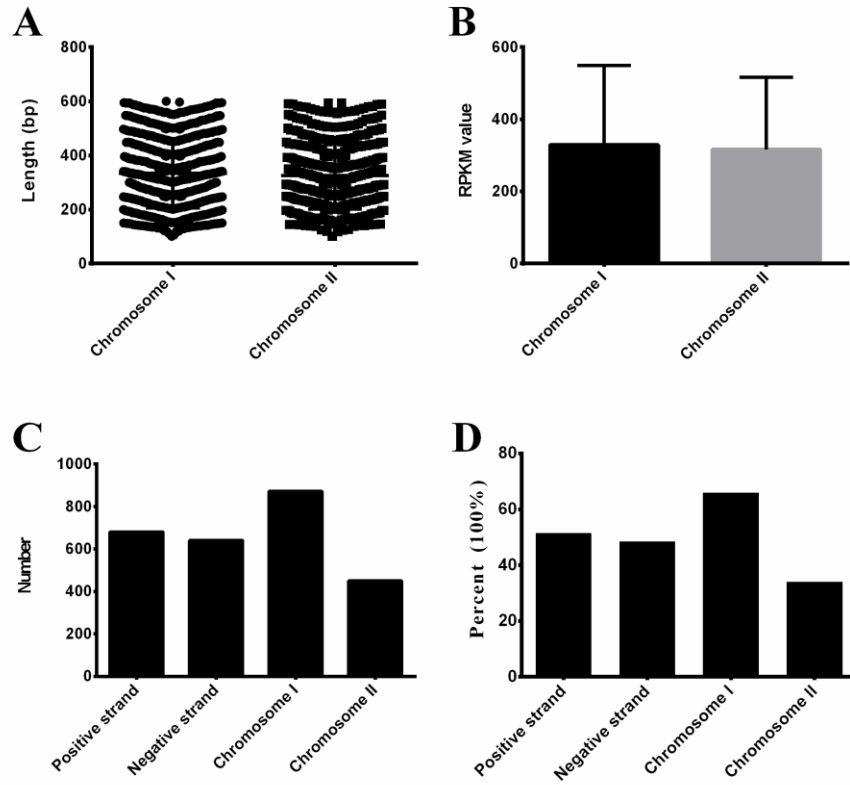

Figure S2. Distributions of candidate sRNAs.

|           |     |                         |     |
|-----------|-----|-------------------------|-----|
| BSR0441   | 233 | 3' GUCUGCGGGUGC 5'      | 222 |
|           |     |                         |     |
| BMEII0791 | 8   | 5' AAGACGCCACA 3'       | 19  |
| BSR0441   | 218 | 3' AGGGCGGGUGC 5'       | 208 |
|           |     | :                       |     |
| BMEII1118 | 3   | 5' GUCCGCCCGA 3'        | 13  |
| BSR0441   | 218 | 3' AGGGCGGGUGC 5'       | 208 |
|           |     | :                       |     |
| BMEII0854 | 11  | 5' AUCCGCCCA- 3'        | 20  |
| BSR0441   | 178 | 3' GCCGC-CCCACGCUACG 5' | 163 |
|           |     |                         |     |
| BMEII0372 | -13 | 5' AGGGGAGGUGCGAUGA 3'  | 4   |
| BSR0441   | 192 | 3' CUACCCCUCCAG 5'      | 179 |
|           |     |                         |     |
| BMEII1007 | -48 | 5' AAU-GGGGCGGUA 3'     | -36 |

Figure S3. Predicted target genes of BSR0441.

## Tables

**Table S1:List of candidate sRNAs.**

**Table S2: Putative mRNA targets of BSR0441 identified by TargetRNA2**

| Locus     | NCBI GI  | Protein Description                                                            | COG <sup>a</sup> | Location <sup>b</sup> | Energy | Pvalue |
|-----------|----------|--------------------------------------------------------------------------------|------------------|-----------------------|--------|--------|
| BMEII0013 | 17988357 | para-aminobenzoate synthase                                                    | EH               | Unknown               | -8.8   | 0.041  |
| BMEII0047 | 17988391 | lysophospholipase l2                                                           | I                | CytoplasmicMembrane   | -10.91 | 0.014  |
| BMEII0051 | 17988395 | nodulation protein w                                                           | T                | Cytoplasmic           | -8.59  | 0.044  |
| BMEII0121 | 17988465 | high-affinity branched-chain amino acid transport system permease protein livh | E                | CytoplasmicMembrane   | -15.18 | 0.001  |
| BMEII0143 | 17988487 | transcriptional regulator, arac family                                         | -                | Cytoplasmic           | -10.45 | 0.019  |
| BMEII0196 | 17988540 | spermidine/putrescine-binding periplasmic protein                              | E                | Periplasmic           | -10.6  | 0.017  |
| BMEII0220 | 17988564 | oligopeptide transport system permease protein oppb                            | EP               | CytoplasmicMembrane   | -8.36  | 0.049  |
| BMEII0240 | 17988584 | dioxygenase                                                                    | R                | Unknown               | -14.09 | 0.002  |
| BMEII0305 | 17988650 | nitrate reductase                                                              | R                | Unknown               | -11.13 | 0.013  |
| BMEII0336 | 17988681 | ABC transporter permease protein                                               | P                | CytoplasmicMembrane   | -15.21 | 0.001  |
| BMEII0349 | 17988694 | general l-amino acid-binding periplasmic protein                               | ET               | Periplasmic           | -18.81 | 0      |
| BMEII0354 | 17988699 | sugar transporter                                                              | S                | Cytoplasmic           | -10.61 | 0.017  |
| BMEII0369 | 17988714 | atrazine chlorohydrolase                                                       | FR               | Cytoplasmic           | -9.96  | 0.024  |
| BMEII0372 | 17988717 | transcriptional regulator, merr family                                         | K                | Unknown               | -17.05 | 0      |
| BMEII0378 | 17988723 | formate dehydrogenase alpha chain                                              | C                | Periplasmic           | -9.41  | 0.031  |
| BMEII0379 | 17988724 | hypothetical protein                                                           | -                | Cytoplasmic           | -10.61 | 0.017  |
| BMEII0399 | 17988744 | hypothetical protein                                                           | -                | Unknown               | -11.65 | 0.009  |
| BMEII0449 | 17988794 | type i restriction-modification system restriction subunit                     | V                | Cytoplasmic           | -8.69  | 0.042  |
| BMEII0476 | 17988821 | uronate isomerase                                                              | G                | Unknown               | -8.43  | 0.047  |
| BMEII0497 | 17988842 | enoyl-CoA hydratase                                                            | I                | Unknown               | -16.73 | 0      |

|           |          |                                                  |    |                     |        |       |
|-----------|----------|--------------------------------------------------|----|---------------------|--------|-------|
| BMEII0511 | 17988856 | phosphogluconate dehydratase                     | -  | Cytoplasmic         | -10.45 | 0.019 |
| BMEII0529 | 17988874 | surface protein                                  | S  | Cytoplasmic         | -14.28 | 0.001 |
| BMEII0539 | 17988884 | hypothetical cytosolic protein                   | S  | Unknown             | -10.01 | 0.023 |
| BMEII0573 | 17988918 | transcriptional regulator, rpir family           | K  | CytoplasmicMembrane | -8.55  | 0.045 |
| BMEII0626 | 17988971 | membrane dipeptidase                             | E  | Unknown             | -9.67  | 0.027 |
| BMEII0703 | 17989048 | fe-s oxidoreductase                              | J  | Cytoplasmic         | -9.02  | 0.037 |
| BMEII0720 | 17989065 | transcriptional regulator                        | -  | Unknown             | -15.84 | 0     |
| BMEII0764 | 17989109 | hypothetical protein                             | -  | Unknown             | -10.08 | 0.022 |
| BMEII0785 | 17989130 | transcriptional regulator, marr family           | K  | Unknown             | -14.36 | 0.001 |
| BMEII0791 | 17989136 | two component response regulator                 | TK | Cytoplasmic         | -19.38 | 0     |
| BMEII0802 | 17989147 | daunorubicin resistance ATP-binding protein drra | V  | Cytoplasmic         | -10.38 | 0.019 |
| BMEII0854 | 17989199 | transcription regulator, crp family              | T  | Cytoplasmic         | -13.05 | 0.004 |
| BMEII0917 | 17989262 | hypothetical protein                             | -  | Unknown             | -9.57  | 0.029 |
| BMEII0924 | 17989269 | hypothetical protein                             | -  | Unknown             | -8.32  | 0.049 |
| BMEII0938 | 17989283 | myo-inositol 2-dehydrogenase                     | R  | Cytoplasmic         | -9.41  | 0.031 |
| BMEII0946 | 17989291 | laci-family transcription regulator              | K  | Cytoplasmic         | -18.77 | 0     |
| BMEII0948 | 17989293 | nitrite extrusion protein                        | P  | CytoplasmicMembrane | -15.08 | 0.001 |
| BMEII0998 | 17989343 | nitric-oxide reductase subunit b                 | P  | CytoplasmicMembrane | -9.19  | 0.034 |
| BMEII1007 | 17989352 | transcriptional regulator, gntr family           | K  | Cytoplasmic         | -8.8   | 0.04  |
| BMEII1017 | 17989362 | mercuric resistance operon regulatory protein    | K  | Cytoplasmic         | -9.45  | 0.03  |
| BMEII1021 | 17989366 | enoyl-CoA hydratase                              | I  | Cytoplasmic         | -10.87 | 0.015 |
| BMEII1040 | 17989385 | cytosine deaminase                               | FJ | Cytoplasmic         | -11.43 | 0.011 |
| BMEII1050 | 17989395 | hypothetical protein                             | -  | Unknown             | -8.78  | 0.041 |
| BMEII1067 | 17989412 | hypothetical cytosolic protein                   | S  | Cytoplasmic         | -10.9  | 0.015 |
| BMEII1068 | 17989413 | cytochrome c2 precursor                          | C  | Periplasmic         | -14.12 | 0.002 |
| BMEII1083 | 17989428 | hypothetical protein                             | S  | Unknown             | -9.29  | 0.033 |
| BMEII1093 | 17989438 | glycerol-3-phosphate regulon repressor           | KJ | Unknown             | -9.7   | 0.027 |

|           |          |                                |   |                     |        |       |
|-----------|----------|--------------------------------|---|---------------------|--------|-------|
| BMEII1118 | 17989463 | multidrug resistance protein a | V | CytoplasmicMembrane | -13.66 | 0.002 |
| BMEII1134 | 17989479 | amidase                        | - | Unknown             | -9.98  | 0.024 |

a: Abbreviation of cellular role categories of theoretical (<http://www.ncbi.nlm.gov/COG/>).

b: Abbreviation of cellular location. Protein cellular location was annotated by PSORTb V. 2.0 (<http://www.psort.org/>).

**Table S3: Primers used in this study.**

| Primer names | Sequence(5'-3')                          |
|--------------|------------------------------------------|
| 16S rRNA-F   | ACTAAGGGCGAGGGTTGC                       |
| 16S rRNA-R   | CACTGGACCATTACTGACGC                     |
| BSR0441-RT-F | TAGACTCTACGAAATC                         |
| BSR0441-RT-R | ACTTTAGGCTTCTAGTAG                       |
| BSR0441-p-F  | GATTTAGACTCTACG                          |
| BSR0441-p-R  | TAATACGACTCACTATAGGGGGACATCCAGACGCCCACG  |
| BSR0441-N-F  | TGGACTTTCGATATGGTGCTG                    |
| BSR0441-N-R  | GACATTCATCCAGGTGGCAGTGTCTAAATCTCTGATATC  |
| BSR0441-C-F  | TCTGGGGTTCGAAATGACCGCCTACTAATCGGCATCGCAC |
| BSR0441-C-R  | GTGACTGCGTAAGCGCTCTC                     |
| BSR0441-I-F  | AGCATCGACAACAGCATGCAG                    |
| BSR0441-I-R  | TCAGCATGAAAGTATGCGCAG                    |
| Kana-F       | GCCACCTGGGATGAATGTC                      |
| Kana-R       | TCTGGGGTTCGAAATGACCG                     |
| Kana-I-F     | ATCAGGACATAGCGTTGG                       |
| Kana-I-R     | GGCAAGAAAGCCATCCAG                       |
| BSR0441-N'-F | CTCGAGGATTTAGACTCTACG                    |
| BSR0441-C'-R | ACTAGTGGACATCCAGACGCCCACG                |
| BMEII0791-F  | GGATATACGCGACCTTCTGC                     |
| BMEII0791-R  | TGGCCGTCAGCATAATGATA                     |
| BMEII1118-F  | TTCGACAGACGATGCCTATG                     |
| BMEII1118-R  | GGATGAGCGTTTCTTTTGC                      |
| BMEII0854-F  | AACGGATCTTCCGTTGTTG                      |
| BMEII0854-R  | TTGGCTTTGTCTGAAACC                       |
| BMEII0372-F  | GCGCATTGAAGCGTATTCTC                     |
| BMEII0372-R  | TACCGCTCCTTCAGGATTTG                     |
| BMEII1007-F  | ATGGAGCGTAAACGTGGTTC                     |
| BMEII1007-R  | CGACTAGACCTTCGCTCGAC                     |
